# Supplementary material for: The application of the segmented teaching method in the Teaching Ward Rounds for surgical residents undergoing standardized training
Source: Research Square preprint supplement (doi:10.21203/rs.3.rs-5648074/v1), 2025-10-10
Supplement: Supplementary file 1 [file 35f84a2bc70b05f7833cfb7c.docx]

**Supplemental Table 1 Assessment Scoring Sheet for Standardized Training of Residency Physicians During Teaching Ward Rounds (For Use by Supervisors/Peer Review)**

| **Domain** | **Content Requirements** | **Full Score** | **Obtained Score** | **Reasons for Deduction** |
| --- | --- | --- | --- | --- |
| **Preparation for Ward Rounds (20 Points)** | 1. Supervising physician is well prepared: qualifications meet requirements; teaching materials for ward rounds are adequately prepared, and patient information is provided to residents in advance. | 6 |  |  |
| 2. Teaching objectives are clear, expression is standardized, time allocation for ward rounds is reasonable, with clear identification of key points and difficulties. | 6 |  |  |
| 3. Selected cases are appropriate, with prior communication with patients, and informed consent obtained from patients and their families. | 4 |  |  |
| 4. The environment and facilities for teaching ward rounds meet the requirements, and the necessary items for physical examination are complete. | 4 |  |  |
| **Ward round implementation (50 points)** | 1. In the demonstration room, the supervising physician and residents introduce each other. The supervising physician explains the objectives, process, time allocation, requirements, and precautions for the teaching ward round. | 5 |  |  |
| 2. The chief resident presents the case without notes, with comprehensive content, clear organization, and prominent key points, and the supervising physician verifies the medical history at the bedside. | 5 |  |  |
| 3. The supervising physician provides clear requirements for the physical examination to the residents and carefully observes the implementation process while demonstrating. | 5 |  |  |
| 4. The teaching ward round team returns to the demonstration room. The supervising physician summarizes and provides feedback on the bedside diagnosis and treatment process, guides the residents in the standardized writing of medical records, and assists the residents in summarizing the case characteristics. | 5 |  |  |
| 5. The supervising physician skillfully guides the residents in the analysis and discussion of diagnosis and differential diagnosis, makes a diagnosis, and lists the diagnostic rationale. | 5 |  |  |
| 6. The supervising physician, in conjunction with the differential diagnosis process, guides the residents in analyzing and interpreting the results of auxiliary examinations and discussing the diagnostic reasoning. | 10 |  |  |
| 7. The supervising physician engages in thorough discussion and guides the residents in formulating specific diagnosis and treatment plans that reflect the principles of evidence-based medicine and “patient-centered approach”. | 5 |  |  |
| 8. The supervising physician connects theoretical knowledge with practical cases, analyzes and explains difficult issues, and introduces new developments in medicine. | 5 |  |  |
| 9. The supervising physician summarizes and comments, reviews the achievement of teaching objectives, poses post-class learning questions, and provides learning materials and references. | 5 |  |  |
| **Ward round skills (16 points)** | 1. The supervising physician uses relevant concepts accurately during the teaching ward rounds, demonstrating strong logic, highlighting key points, thoroughly explaining difficult topics, managing time effectively, and exhibiting strong teaching adaptability. | 4 |  |  |
| 2. The supervising physician is able to connect theory with practical cases during the teaching ward rounds, guiding the residents in a tiered manner to conduct rounds and discussions, and appropriately summarizing and concluding at the right moments. | 4 |  |  |
| 3. The supervising physician consistently conducts teaching and guidance focused on the cases discussed during the teaching ward rounds, helping residents cultivate their clinical skills in information gathering and diagnostic decision-making (if presented as a knowledge-based mini-lecture, this item will not be scored). | 4 |  |  |
| 4. The supervising physician makes appropriate use of whiteboards and/or multimedia teaching tools in accordance with teaching requirements.The language used in teaching is vivid, professional, and standardized, effectively teaching specialized English vocabulary. | 4 |  |  |
| **Overall impression (14 points)** | 1. The supervising physician has clear teaching objectives, the implementation process complies with standards, effectively reflecting the cultivation of clinical abilities in residents, and meets the requirements of the training guidelines. | 4 |  |  |
| 2. The supervising physician implements the educational philosophy of fostering virtue and nurturing people during the teaching ward rounds, reflecting the integration of ideological and political education, emphasizing“patient-centered approach”, focusing on imparting communication skills between doctors and patients, and demonstrating a humanistic care. | 3 |  |  |
| 3. The bedside round's basic process, content, and outcomes meet the requirements for teaching ward rounds, and the case discussion process is sufficiently interactive. | 4 |  |  |
| 4. The supervising physician has a clear educational philosophy and demonstrates strong teaching enthusiasm. The ward round demonstrations are effective and patient-focused; attire is neat, professional demeanor is maintained, language is standardized, and guidance is appropriate. | 3 |  |  |
| **Total score** | | 100 |  |  |

**Supplemental Table 2 Mini-CEX evaluation form (supervising physician evaluates resident)**

| Domain | Not Applicable / Not Assessed | Assessment Results | | | | | | | | |
| --- | --- | --- | --- | --- | --- | --- | --- | --- | --- | --- |
| **Not Meeting Standards** | | | **Meets Standards** | | | **Exceeds Expectations** | | |
| 1 | 2 | 3 | 4 | 5 | 6 | 7 | 8 | 9 |
| Medical interviewing skills |  |  |  |  |  |  |  |  |  |  |
| Physical examination skills |  |  |  |  |  |  |  |  |  |  |
| Humanistic qualities |  |  |  |  |  |  |  |  |  |  |
| Clinical judgment |  |  |  |  |  |  |  |  |  |  |
| Counseling skills |  |  |  |  |  |  |  |  |  |  |
| Organizational/efficiency |  |  |  |  |  |  |  |  |  |  |
| Overall clinical competence |  |  |  |  |  |  |  |  |  |  |

**Supplemental Table 3 360-Degree Assessment for Standardized Training of Resident Physicians Resident Physician Assessment Scale for Clinical Supervisors(resident evaluates supervising physician)**

| **Core Competency Classification** | **Assessment Items** | **Full Score** | **Obtained Score** |
| --- | --- | --- | --- |
| **Teaching Enthusiasm** | The supervising physician is enthusiastic about teaching and is willing to dedicate sufficient time to participate in the educational activities of resident physicians. | 10 |  |
| The supervising physician is able to create a positive training and educational environment for resident physicians. | 10 |  |
| The supervising physician serves as a role model, works diligently, and is able to establish a positive working relationship with resident physicians. | 10 |  |
| **Clinical Teaching Ability** | The supervising physician possesses strong teaching ability. | 10 |  |
| The supervising physician prepares thoroughly for all teaching activities, presenting the material in a clear and accessible manner. | 10 |  |
| **Clinical Work Competence** | The supervising physician possesses substantial clinical experience and strong clinical diagnostic skills. | 10 |  |
| The supervising physician rigorously supervises the clinical work of resident physicians and is dedicated to cultivating their independent practice skills. | 10 |  |
| **Cultivating Evidence-Based Medicine Competency in Resident Physicians** | The supervising physician is able to utilize evidence-based medicine and current advanced medical knowledge in their teaching. | 10 |  |
| **Teaching Feedback** | The supervising physician provides timely feedback on the performance of resident physicians during their training. | 10 |  |

**Supplemental Table 4 Student Evaluation of Educational Quality (SEEQ) Assessment Scale (For Use by residents )**

| **Domain** | Assessment Results | | | | | | | Obtained Score |
| --- | --- | --- | --- | --- | --- | --- | --- | --- |
| **Learning** |
| I found this course to be intellectually challenging and motivating | 1-Strongly Disagree | 1 | 2 | 3 | 4 | 5 | 5-Strongly Agree |  |
| I have learned what I believe is valuable | 1-Strongly Disagree | 1 | 2 | 3 | 4 | 5 | 5-Strongly Agree |  |
| I have increased my interest in this course through it | 1-Strongly Disagree | 1 | 2 | 3 | 4 | 5 | 5-Strongly Agree |  |
| I learned and mastered the content of this course through this course | 1-Strongly Disagree | 1 | 2 | 3 | 4 | 5 | 5-Strongly Agree |  |
| **Enthusiasm** |  |  |  |  |  |  |  |  |
| The teacher is full of enthusiasm during class | 1-Strongly Disagree | 1 | 2 | 3 | 4 | 5 | 5-Strongly Agree |  |
| The teacher is full of vitality and energy during class | 1-Strongly Disagree | 1 | 2 | 3 | 4 | 5 | 5-Strongly Agree |  |
| The teacher’s teaching style is humorous and witty | 1-Strongly Disagree | 1 | 2 | 3 | 4 | 5 | 5-Strongly Agree |  |
| The way the teacher lectures is very attractive to me | 1-Strongly Disagree | 1 | 2 | 3 | 4 | 5 | 5-Strongly Agree |  |
| **Organization** |  |  |  |  |  |  |  |  |
| Please understand the teacher’s explanation clearly | 1-Strongly Disagree | 1 | 2 | 3 | 4 | 5 | 5-Strongly Agree |  |
| The teacher will carefully prepare and explain the course content | 1-Strongly Disagree | 1 | 2 | 3 | 4 | 5 | 5-Strongly Agree |  |
| The actual teaching content is consistent with the teaching objectives, which enables me to keep up with the progress of this course | 1-Strongly Disagree | 1 | 2 | 3 | 4 | 5 | 5-Strongly Agree |  |
| The teacher’s explanation in class helps me organize my notes | 1-Strongly Disagree | 1 | 2 | 3 | 4 | 5 | 5-Strongly Agree |  |
| **Group interaction** |  |  |  |  |  |  |  |  |
| The teacher will encourage us to participate in classroom discussions | 1-Strongly Disagree | 1 | 2 | 3 | 4 | 5 | 5-Strongly Agree |  |
| The teacher will invite us to share ideas and knowledge | 1-Strongly Disagree | 1 | 2 | 3 | 4 | 5 | 5-Strongly Agree |  |
| The teacher will encourage us to ask questions and provide us with appropriate answers | 1-Strongly Disagree | 1 | 2 | 3 | 4 | 5 | 5-Strongly Agree |  |
| The teacher will encourage us to express our own opinions or raise questions to the teacher | 1-Strongly Disagree | 1 | 2 | 3 | 4 | 5 | 5-Strongly Agree |  |
| **Individual Rapport** |  |  |  |  |  |  |  |  |
| The teacher is very friendly to each and every one of us | 1-Strongly Disagree | 1 | 2 | 3 | 4 | 5 | 5-Strongly Agree |  |
| Whether in class or after class, teachers welcome us to seek help or ask questions | 1-Strongly Disagree | 1 | 2 | 3 | 4 | 5 | 5-Strongly Agree |  |
| The teacher is interested in each of our questions | 1-Strongly Disagree | 1 | 2 | 3 | 4 | 5 | 5-Strongly Agree |  |
| We can easily find teachers, whether it’s during office hours or after class time | 1-Strongly Disagree | 1 | 2 | 3 | 4 | 5 | 5-Strongly Agree |  |
| **Course Expansion (Breadth)** |  |  |  |  |  |  |  |  |
| Teachers can compare the connotations of various related theories | 1-Strongly Disagree | 1 | 2 | 3 | 4 | 5 | 5-Strongly Agree |  |
| Can the teacher introduce the background knowledge and conceptual sources used in the course | 1-Strongly Disagree | 1 | 2 | 3 | 4 | 5 | 5-Strongly Agree |  |
| The teacher will present various viewpoints at the appropriate time to stimulate our thinking | 1-Strongly Disagree | 1 | 2 | 3 | 4 | 5 | 5-Strongly Agree |  |
| Teachers are able to fully discuss the latest developments and trends related to the curriculum field | 1-Strongly Disagree | 1 | 2 | 3 | 4 | 5 | 5-Strongly Agree |  |
| At appropriate times, the teacher presents some viewpoints rather than his/her own | 1-Strongly Disagree | 1 | 2 | 3 | 4 | 5 | 5-Strongly Agree |  |
| **Examinations** |  |  |  |  |  |  |  |  |
| Examinations or grades are valuable in assessing the effectiveness of the course’s teaching | 1-Strongly Disagree | 1 | 2 | 3 | 4 | 5 | 5-Strongly Agree |  |
| The teacher’s evaluation of each of us is fair and appropriate | 1-Strongly Disagree | 1 | 2 | 3 | 4 | 5 | 5-Strongly Agree |  |
| The emphasis emphasized by the teacher is consistent with the exam content | 1-Strongly Disagree | 1 | 2 | 3 | 4 | 5 | 5-Strongly Agree |  |
| **Assignments** |  |  |  |  |  |  |  |  |
| The necessary reading or practice for this course is valuable | 1-Strongly Disagree | 1 | 2 | 3 | 4 | 5 | 5-Strongly Agree |  |
| The reading and homework of this course are helpful for understanding and improving the course theme | 1-Strongly Disagree | 1 | 2 | 3 | 4 | 5 | 5-Strongly Agree |  |
| **Overall impression** |  |  |  |  |  |  |  |  |
| I think this course is better than other courses | 1-Strongly Disagree | 1 | 2 | 3 | 4 | 5 | 5-Strongly Agree |  |
| I think the teacher for this course is better than the teacher for other courses | 1-Strongly Disagree | 1 | 2 | 3 | 4 | 5 | 5-Strongly Agree |  |
| **Student and Course Characteristics** |  |  |  |  |  |  |  |  |
| The difficulty of this course is higher than other courses | 1- Very Difficult | 1 | 2 | 3 | 4 | 5 | 5- Very Easy |  |
| This course has a relatively large amount of homework compared to other courses | 1- Very Difficult | 1 | 2 | 3 | 4 | 5 | 5- Very Easy |  |
| Course Progress for This Class | 1-Too Slow | 1 | 2 | 3 | 4 | 5 | 5-Too fast |  |
| The time I spend after each week of this course |  | 0-2 hours | 2-5 hours | 5-7 hours | 7-12 hours | Above 12 hours |  |  |
| Your level of interest in this course prior to taking it. | 1-Very Low | 1 | 2 | 3 | 4 | 5 | 5 -Very High |  |
| My overall evaluation of this course |  | Below 2.5 | 2.5-3.0 | 3.0-3.4 | 3.4-3.7 | Above 3.7 |  |  |
| My expected grades for this course |  | Below 70 | 70-75 | 75-80 | 80-85 | Above 85 |  |  |
| The reason I am taking this course, please select the most appropriate option |  | Required Course | Elective Course | College Requirements | Minor in Related Field | Simply Out of Interest |  |  |
| My Grade |  | First Year of Residency Training | Second Year of Residency Training | Third Year of Residency Training | Resident Physician of This Institution | Advanced Training Physician |  |  |
| My Major |  | Surgery | Internal Medicine | Radiology | Obstetrics and Gynecology | Emergency Medicine |  |  |
|  |  |  |  |  |  |  |  |  |
